# Supplementary material for: Environment Status Estimation of the Forest Communities Based on Floristic Surveys in the Mordovia State Nature Reserve, Russia
Source: MDPI journal article supplement (doi:10.3390/f12111475), 2021-10-28
Supplement: s1 [file s1]

# Environment status estimation of the forest communities based on floristic surveys in the Mordovia State Nature Reserve, Russia

Anatoliy A. Khapugin <sup>1,2,\*</sup>

<sup>1</sup> Joint Directorate of the Mordovia State Nature Reserve and National Park "Smolny", 430005 Saransk, Russia

<sup>2</sup> Institute of Environmental and Agricultural Biology (X-BIO), Tyumen State University, 625003 Tyumen, Russia

\* Correspondence: hapugin88@yandex.ru

## Supplementary Materials

**Table S1** Characteristics of the vascular plant flora occurring in 161 plots studied in the Mordovia State Nature Reserve, European Russia

| Species                                            | Family           | Frequency of occurrence | Life form        |
|----------------------------------------------------|------------------|-------------------------|------------------|
| <i>Pinus sylvestris</i> L.                         | Pinaceae         | 84.5                    | Phanerophyte     |
| <i>Frangula alnus</i> Mill.                        | Rhamnaceae       | 83.9                    | Nanophanerophyte |
| <i>Picea abies</i> (L.) H.Karst.                   | Pinaceae         | 80.1                    | Phanerophyte     |
| <i>Sorbus aucuparia</i> L.                         | Rosaceae         | 80.1                    | Phanerophyte     |
| <i>Betula pendula</i> Roth                         | Betulaceae       | 73.9                    | Phanerophyte     |
| <i>Quercus robur</i> L.                            | Fagaceae         | 66.5                    | Phanerophyte     |
| <i>Lysimachia europaea</i> (L.) U.Manns & Anderb.  | Primulaceae      | 63.4                    | Geophyte         |
| <i>Vaccinium myrtillus</i> L.                      | Ericaceae        | 63.4                    | Chamaephyte      |
| <i>Convallaria majalis</i> L.                      | Asparagaceae     | 62.7                    | Geophyte         |
| <i>Luzula pilosa</i> (L.) Willd.                   | Juncaceae        | 62.1                    | Hemicryptophyte  |
| <i>Maianthemum bifolium</i> (L.) F.W.Schmidt       | Asparagaceae     | 51.6                    | Geophyte         |
| <i>Rubus saxatilis</i> L.                          | Rosaceae         | 47.2                    | Chamaephyte      |
| <i>Melampyrum pratense</i> L.                      | Orobanchaceae    | 42.2                    | Therophyte       |
| <i>Dryopteris carthusiana</i> (Vill.) H.P.Fuchs    | Polypodiaceae    | 41.6                    | Hemicryptophyte  |
| <i>Rubus idaeus</i> L.                             | Rosaceae         | 41.0                    | Nanophanerophyte |
| <i>Vaccinium vitis-idaea</i> L.                    | Ericaceae        | 40.4                    | Chamaephyte      |
| <i>Dryopteris filix-mas</i> (L.) Schott            | Polypodiaceae    | 39.1                    | Hemicryptophyte  |
| <i>Fragaria vesca</i> L.                           | Rosaceae         | 37.3                    | Hemicryptophyte  |
| <i>Carex digitata</i> L.                           | Cyperaceae       | 34.8                    | Hemicryptophyte  |
| <i>Rubus holostea</i> (L.) M.T.Sharple & E.A.Tripp | Caryophyllaceae  | 34.8                    | Chamaephyte      |
| <i>Pteridium pinetorum</i> C.N.Page & R.R.Mill     | Dennstaedtiaceae | 31.7                    | Geophyte         |
| <i>Acer platanoides</i> L.                         | Sapindaceae      | 29.8                    | Phanerophyte     |
| <i>Tilia cordata</i> Mill.                         | Malvaceae        | 29.2                    | Phanerophyte     |
| <i>Lonicera xylosteum</i> L.                       | Caprifoliaceae   | 28.0                    | Nanophanerophyte |
| <i>Melica nutans</i> L.                            | Poaceae          | 26.7                    | Hemicryptophyte  |
| <i>Lolium giganteum</i> (L.) Darbysh.              | Poaceae          | 24.2                    | Hemicryptophyte  |
| <i>Orthilia secunda</i> (L.) House                 | Ericaceae        | 23.6                    | Chamaephyte      |
| <i>Rubus polonicus</i> Weston                      | Rosaceae         | 23.6                    | Nanophanerophyte |
| <i>Asarum europaeum</i> L.                         | Aristolochiaceae | 23.0                    | Hemicryptophyte  |
| <i>Calamagrostis arundinacea</i> (L.) Roth         | Poaceae          | 21.7                    | Hemicryptophyte  |
| <i>Molinia caerulea</i> (L.) Moench                | Poaceae          | 21.7                    | Hemicryptophyte  |
| <i>Solidago virgaurea</i> L.                       | Asteraceae       | 21.1                    | Hemicryptophyte  |
| <i>Euonymus verrucosus</i> Scop.                   | Celastraceae     | 18.0                    | Phanerophyte     |
| <i>Melampyrum nemorosum</i> L.                     | Orobanchaceae    | 16.1                    | Therophyte       |
| <i>Oxalis acetosella</i> L.                        | Oxalidaceae      | 16.1                    | Geophyte         |
| <i>Corylus avellana</i> L.                         | Betulaceae       | 15.5                    | Phanerophyte     |
| <i>Poa nemoralis</i> L.                            | Poaceae          | 15.5                    | Hemicryptophyte  |
| <i>Lysimachia vulgaris</i> L.                      | Primulaceae      | 14.9                    | Hemicryptophyte  |
| <i>Carex pilosa</i> Scop.                          | Cyperaceae       | 14.3                    | Hemicryptophyte  |
| <i>Betula pubescens</i> Ehrh.                      | Betulaceae       | 13.0                    | Phanerophyte     |
| <i>Hypericum perforatum</i> L.                     | Hypericaceae     | 11.8                    | Hemicryptophyte  |
| <i>Veronica chamaedrys</i> L.                      | Plantaginaceae   | 11.8                    | Chamaephyte      |
| <i>Salix cinerea</i> L.                            | Salicaceae       | 11.2                    | Phanerophyte     |
| <i>Aegopodium podagraria</i> L.                    | Apiaceae         | 10.6                    | Hemicryptophyte  |
| <i>Lathyrus vernus</i> (L.) Bernh.                 | Fabaceae         | 10.6                    | Hemicryptophyte  |
| <i>Milium effusum</i> L.                           | Poaceae          | 10.6                    | Hemicryptophyte  |
| <i>Viola mirabilis</i> L.                          | Violaceae        | 10.6                    | Hemicryptophyte  |
| <i>Calamagrostis canescens</i> (Weber) Roth        | Poaceae          | 9.9                     | Hemicryptophyte  |
| <i>Carex pallescens</i> L.                         | Cyperaceae       | 9.3                     | Hemicryptophyte  |

| Species                                                    | Family          | Frequency of occurrence | Life form                      |
|------------------------------------------------------------|-----------------|-------------------------|--------------------------------|
| <i>Veronica officinalis</i> L.                             | Plantaginaceae  | 9.3                     | Chamaephyte                    |
| <i>Epilobium angustifolium</i> L.                          | Onagraceae      | 8.1                     | Hemicryptophyte                |
| <i>Glechoma hederacea</i> L.                               | Lamiaceae       | 8.1                     | Hemicryptophyte                |
| <i>Carex canescens</i> L.                                  | Cyperaceae      | 7.5                     | Hemicryptophyte                |
| <i>Carex rostrata</i> Stokes                               | Cyperaceae      | 7.5                     | Helophyte and Hemicryptophyte  |
| <i>Platanthera bifolia</i> (L.) Rich.                      | Orchidaceae     | 7.5                     | Geophyte                       |
| <i>Equisetum sylvaticum</i> L.                             | Equisetaceae    | 6.8                     | Geophyte                       |
| <i>Eriophorum vaginatum</i> L.                             | Cyperaceae      | 6.8                     | Hemicryptophyte                |
| <i>Populus tremula</i> L.                                  | Salicaceae      | 6.8                     | Phanerophyte                   |
| <i>Viola rupestris</i> F.W.Schmidt                         | Violaceae       | 6.8                     | Hemicryptophyte                |
| <i>Stellaria media</i> (L.) Vill.                          | Caryophyllaceae | 6.2                     | Therophyte and Hemicryptophyte |
| <i>Vaccinium uliginosum</i> L.                             | Ericaceae       | 6.2                     | Nanophanerophyte               |
| <i>Anthoxanthum odoratum</i> L.                            | Poaceae         | 5.6                     | Hemicryptophyte                |
| <i>Carex lasiocarpa</i> Ehrh.                              | Cyperaceae      | 5.6                     | Helophyte                      |
| <i>Carex vesicaria</i> L.                                  | Cyperaceae      | 5.6                     | Helophyte                      |
| <i>Daphne mezereum</i> L.                                  | Thymelaeaceae   | 5.6                     | Nanophanerophyte               |
| <i>Galium mollugo</i> L.                                   | Rubiaceae       | 5.6                     | Hemicryptophyte                |
| <i>Pilosella officinarum</i> Vaill.                        | Asteraceae      | 5.6                     | Hemicryptophyte                |
| <i>Juncus effusus</i> L.                                   | Juncaceae       | 5.6                     | Hemicryptophyte                |
| <i>Juniperus communis</i> L.                               | Cupressaceae    | 5.6                     | Nanophanerophyte               |
| <i>Lysimachia thyrsiflora</i> L.                           | Primulaceae     | 5.6                     | Hemicryptophyte                |
| <i>Pulmonaria obscura</i> Dumort.                          | Boraginaceae    | 5.6                     | Hemicryptophyte                |
| <i>Salix caprea</i> L.                                     | Salicaceae      | 5.6                     | Phanerophyte                   |
| <i>Antennaria dioica</i> (L.) Gaertn.                      | Asteraceae      | 5.0                     | Hemicryptophyte                |
| <i>Calamagrostis epigejos</i> (L.) Roth                    | Poaceae         | 5.0                     | Hemicryptophyte                |
| <i>Comarum palustre</i> L.                                 | Rosaceae        | 5.0                     | Chamaephyte                    |
| <i>Pilosella echinoides</i> (Lumn.) F.W.Schultz & Sch.Bip. | Asteraceae      | 5.0                     | Hemicryptophyte                |
| <i>Hieracium umbellatum</i> L.                             | Asteraceae      | 5.0                     | Hemicryptophyte                |
| <i>Scirpus sylvaticus</i> L.                               | Cyperaceae      | 5.0                     | Helophyte and Geophyte         |
| <i>Carex nigra</i> (L.) Reichard                           | Cyperaceae      | 4.3                     | Geophyte                       |
| <i>Lolium pratense</i> (Huds.) Darbysh.                    | Poaceae         | 4.3                     | Hemicryptophyte                |
| <i>Viscaria vulgaris</i> Röhl.                             | Caryophyllaceae | 4.3                     | Hemicryptophyte                |
| <i>Calla palustris</i> L.                                  | Araceae         | 3.7                     | Helophyte                      |
| <i>Carex elongata</i> L.                                   | Cyperaceae      | 3.7                     | Hemicryptophyte                |
| <i>Cicuta virosa</i> L.                                    | Apiaceae        | 3.7                     | Hemicryptophyte                |
| <i>Rhododendron tomentosum</i> Harmaja                     | Ericaceae       | 3.7                     | Nanophanerophyte               |
| <i>Linnaea borealis</i> L.                                 | Caprifoliaceae  | 3.7                     | Chamaephyte                    |
| <i>Mercurialis perennis</i> L.                             | Euphorbiaceae   | 3.7                     | Hemicryptophyte                |
| <i>Sambucus racemosa</i> L.                                | Viburnaceae     | 3.7                     | Phanerophyte                   |
| <i>Chimaphila umbellata</i> (L.) W.P.C.Barton              | Ericaceae       | 3.1                     | Chamaephyte                    |
| <i>Poa pratensis</i> L.                                    | Poaceae         | 3.1                     | Hemicryptophyte                |
| <i>Rumex acetosella</i> L.                                 | Polygonaceae    | 3.1                     | Hemicryptophyte                |
| <i>Stellaria graminea</i> L.                               | Caryophyllaceae | 3.1                     | Hemicryptophyte                |
| <i>Viburnum opulus</i> L.                                  | Viburnaceae     | 3.1                     | Phanerophyte                   |
| <i>Angelica sylvestris</i> L.                              | Apiaceae        | 2.5                     | Hemicryptophyte                |
| <i>Epipactis helleborine</i> (L.) Crantz                   | Orchidaceae     | 2.5                     | Geophyte                       |
| <i>Hieracium sylvularum</i> Jord. ex Boreau                | Asteraceae      | 2.5                     | Hemicryptophyte                |
| <i>Polygonatum multiflorum</i> (L.) All.                   | Asparagaceae    | 2.5                     | Geophyte                       |
| <i>Polygonatum odoratum</i> (Mill.) Druce                  | Asparagaceae    | 2.5                     | Geophyte                       |
| <i>Prunella vulgaris</i> L.                                | Lamiaceae       | 2.5                     | Hemicryptophyte                |
| <i>Pyrola chlorantha</i> Sw.                               | Ericaceae       | 2.5                     | Chamaephyte                    |
| <i>Salix aurita</i> L.                                     | Salicaceae      | 2.5                     | Nanophanerophyte               |
| <i>Scutellaria galericulata</i> L.                         | Lamiaceae       | 2.5                     | Hemicryptophyte                |
| <i>Achillea millefolium</i> L.                             | Asteraceae      | 1.9                     | Hemicryptophyte                |
| <i>Alnus glutinosa</i> (L.) Gaertn.                        | Betulaceae      | 1.9                     | Phanerophyte                   |
| <i>Athyrium filix-femina</i> (L.) Roth                     | Aspleniaceae    | 1.9                     | Hemicryptophyte                |
| <i>Calluna vulgaris</i> (L.) Hull                          | Ericaceae       | 1.9                     | Chamaephyte                    |
| <i>Carex leporina</i> L.                                   | Cyperaceae      | 1.9                     | Hemicryptophyte                |
| <i>Clinopodium vulgare</i> L.                              | Lamiaceae       | 1.9                     | Hemicryptophyte                |
| <i>Gymnocarpium dryopteris</i> (L.) Newman                 | Aspleniaceae    | 1.9                     | Geophyte                       |
| <i>Hylotelephium maximum</i> (L.) Holub                    | Crassulaceae    | 1.9                     | Hemicryptophyte                |
| <i>Lemna minor</i> L.                                      | Araceae         | 1.9                     | Helophyte                      |
| <i>Menyanthes trifoliata</i> L.                            | Menyanthaceae   | 1.9                     | Helophyte                      |
| <i>Prunus padus</i> L.                                     | Rosaceae        | 1.9                     | Phanerophyte                   |
| <i>Paris quadrifolia</i> L.                                | Melanthiaceae   | 1.9                     | Geophyte                       |
| <i>Pyrola rotundifolia</i> L.                              | Ericaceae       | 1.9                     | Chamaephytea                   |
| <i>Vicia sylvatica</i> L.                                  | Fabaceae        | 1.9                     | Hemicryptophyte                |
| <i>Alchemilla</i> sp.                                      | Rosaceae        | 1.2                     | Hemicryptophyte                |

| Species                                            | Family           | Frequency of occurrence | Life form                      |
|----------------------------------------------------|------------------|-------------------------|--------------------------------|
| <i>Campanula patula</i> L.                         | Campanulaceae    | 1.2                     | Hemicryptophyte                |
| <i>Campanula rotundifolia</i> L.                   | Campanulaceae    | 1.2                     | Hemicryptophyte                |
| <i>Carex acuta</i> L.                              | Cyperaceae       | 1.2                     | Helophyte                      |
| <i>Carex brunnescens</i> (Pers.) Poir.             | Cyperaceae       | 1.2                     | Hemicryptophyte                |
| <i>Carex globularis</i> L.                         | Cyperaceae       | 1.2                     | Geophyte                       |
| <i>Erigeron annuus</i> (L.) Desf                   | Asteraceae       | 1.2                     | Therophyte                     |
| <i>Galium palustre</i> L.                          | Rubiaceae        | 1.2                     | Hemicryptophyte                |
| <i>Lycopus europaeus</i> L.                        | Lamiaceae        | 1.2                     | Hemicryptophyte                |
| <i>Phleum pratense</i> L.                          | Poaceae          | 1.2                     | Hemicryptophyte                |
| <i>Phragmites australis</i> (Cav.) Trin. ex Steud. | Poaceae          | 1.2                     | Helophyte and Geophyte         |
| <i>Plantago major</i> L.                           | Plantaginaceae   | 1.2                     | Hemicryptophyte                |
| <i>Poa annua</i> L.                                | Poaceae          | 1.2                     | Therophyte                     |
| <i>Ranunculus acris</i> L.                         | Ranunculaceae    | 1.2                     | Hemicryptophyte                |
| <i>Scrophularia nodosa</i> L.                      | Scrophulariaceae | 1.2                     | Hemicryptophyte                |
| <i>Thelypteris palustris</i> Schott                | Aspleniaceae     | 1.2                     | Geophyte                       |
| <i>Valeriana officinalis</i> L.                    | Caprifoliaceae   | 1.2                     | Hemicryptophyte                |
| <i>Aconitum septentrionale</i> Koelle              | Ranunculaceae    | 0.6                     | Hemicryptophyte                |
| <i>Actaea spicata</i> L.                           | Ranunculaceae    | 0.6                     | Hemicryptophyte                |
| <i>Agrostis capillaris</i> L.                      | Poaceae          | 0.6                     | Hemicryptophyte                |
| <i>Alopecurus pratensis</i> L.                     | Poaceae          | 0.6                     | Hemicryptophyte                |
| <i>Artemisia campestris</i> L.                     | Asteraceae       | 0.6                     | Chamaephyte                    |
| <i>Peucedanum palustre</i> (L.) Moench             | Apiaceae         | 0.6                     | Geophyte                       |
| <i>Carex atherodes</i> Spreng.                     | Cyperaceae       | 0.6                     | Geophyte                       |
| <i>Carex limosa</i> L.                             | Cyperaceae       | 0.6                     | Geophyte                       |
| <i>Carex loliacea</i> L.                           | Cyperaceae       | 0.6                     | Hemicryptophyte                |
| <i>Carlina biebersteinii</i> Bernh. ex Hornem.     | Asteraceae       | 0.6                     | Hemicryptophyte                |
| <i>Centaurea phrygia</i> L.                        | Asteraceae       | 0.6                     | Hemicryptophyte                |
| <i>Chamaedaphne calyculata</i> (L.) Moench         | Ericaceae        | 0.6                     | Nanophanerophyte               |
| <i>Cirsium heterophyllum</i> (L.) Hill             | Asteraceae       | 0.6                     | Hemicryptophyte                |
| <i>Cirsium oleraceum</i> (L.) Scop.                | Asteraceae       | 0.6                     | Hemicryptophyte                |
| <i>Dactylis glomerata</i> L.                       | Poaceae          | 0.6                     | Hemicryptophyte                |
| <i>Dryopteris cristata</i> (L.) A.Gray             | Polypodiaceae    | 0.6                     | Hemicryptophyte                |
| <i>Equisetum fluviatile</i> L.                     | Equisetaceae     | 0.6                     | Helophyte                      |
| <i>Fallopia convolvulus</i> (L.) Á.Löve            | Polygonaceae     | 0.6                     | Therophyte                     |
| <i>Filipendula ulmaria</i> (L.) Maxim.             | Rosaceae         | 0.6                     | Hemicryptophyte                |
| <i>Galeopsis bifida</i> Boenn.                     | Lamiaceae        | 0.6                     | Therophyte                     |
| <i>Galeopsis speciosa</i> Mill.                    | Lamiaceae        | 0.6                     | Therophyte                     |
| <i>Galium odoratum</i> (L.) Scop.                  | Rubiaceae        | 0.6                     | Hemicryptophyte                |
| <i>Glyceria fluitans</i> (L.) R.Br.                | Poaceae          | 0.6                     | Helophyte                      |
| <i>Juncus conglomeratus</i> L.                     | Juncaceae        | 0.6                     | Hemicryptophyte                |
| <i>Knautia arvensis</i> (L.) Coult.                | Caprifoliaceae   | 0.6                     | Hemicryptophyte                |
| <i>Lamium maculatum</i> (L.) L.                    | Lamiaceae        | 0.6                     | Hemicryptophyte                |
| <i>Lycopodium clavatum</i> L.                      | Lycopodiaceae    | 0.6                     | Chamaephyte                    |
| <i>Malus domestica</i> (Suckow) Borkh.             | Rosaceae         | 0.6                     | Phanerophyte                   |
| <i>Malus sylvestris</i> (L.) Mill.                 | Rosaceae         | 0.6                     | Phanerophyte                   |
| <i>Moehringia trinervia</i> (L.) Clairv.           | Caryophyllaceae  | 0.6                     | Therophyte and Hemicryptophyte |
| <i>Oenanthe aquatica</i> (L.) Poir.                | Apiaceae         | 0.6                     | Helophyte                      |
| <i>Pimpinella saxifraga</i> L.                     | Apiaceae         | 0.6                     | Hemicryptophyte                |
| <i>Poa palustris</i> L.                            | Poaceae          | 0.6                     | Hemicryptophyte                |
| <i>Persicaria amphibia</i> (L.) Delarbre           | Polygonaceae     | 0.6                     | Helophyte and Geophyte         |
| <i>Persicaria hydropiper</i> (L.) Delarbre         | Polygonaceae     | 0.6                     | Therophyte                     |
| <i>Persicaria maculosa</i> Gray                    | Polygonaceae     | 0.6                     | Therophyte                     |
| <i>Potentilla argentea</i> L.                      | Rosaceae         | 0.6                     | Hemicryptophyte                |
| <i>Ranunculus sceleratus</i> L.                    | Ranunculaceae    | 0.6                     | Hemicryptophyte                |
| <i>Ribes nigrum</i> L.                             | Grossulariaceae  | 0.6                     | Nanophanerophyte               |
| <i>Scheuchzeria palustris</i> L.                   | Scheuchzeriaceae | 0.6                     | Geophyte                       |
| <i>Jacobaea vulgaris</i> Gaertn.                   | Asteraceae       | 0.6                     | Hemicryptophyte                |
| <i>Solanum dulcamara</i> L.                        | Solanaceae       | 0.6                     | Nanophanerophyte               |
| <i>Spirodela polyrhiza</i> (L.) Schleid.           | Araceae          | 0.6                     | Helophyte                      |
| <i>Taraxacum officinale</i> F.H.Wigg.              | Asteraceae       | 0.6                     | Hemicryptophyte                |
| <i>Urtica dioica</i> L.                            | Urticaceae       | 0.6                     | Geophyte                       |
| <i>Utricularia minor</i> L.                        | Lentibulariaceae | 0.6                     | Hydrophyte                     |
| <i>Utricularia vulgaris</i> L.                     | Lentibulariaceae | 0.6                     | Hydrophyte                     |

Note: Names of species and families refer to the POWO database (<http://www.plantsoftheworldonline.org/>); Frequency of occurrence was calculated as the ratio of the number of study plots where a species was found to the total number of the studied plots (161); life forms are designated according to the Raunkiaer [25] classification.
